1

2 **Genome and community-level interaction insights on wide carbon utilizing and**  
3 **element cycling function of Hydrothermarchaeota from hydrothermal sediment**

4

5

6

7

Zhichao Zhou<sup>1,2</sup>, Yang Liu<sup>1</sup>, Wei Xu<sup>3</sup>, Jie Pan<sup>1</sup>, Zhu-Hua Luo<sup>3\*</sup>, Meng Li<sup>1\*</sup>

8

9

10 <sup>1</sup> Institute for Advanced Study, Shenzhen University, Shenzhen 518060, People's Republic of China

11

12 <sup>2</sup> Department of Bacteriology, University of Wisconsin Madison, Madison, WI, 53706, USA

13

14 <sup>3</sup> Key Laboratory of Marine Biogenetic Resources, Third Institute of Oceanography, Ministry of  
15 Natural Resources, Xiamen 361005, People's Republic of China

16

17

18

19 \*Corresponding authors

20 Meng Li

21 e-mail: limeng848@szu.edu.cn

22

23 Zhu-Hua Luo

24 e-mail: luozhuhua@tio.org.cn

## 25 Abstract

26 Hydrothermal vents release reduced compounds and small organic carbons into surrounding  
27 seawaters, providing essential substrates for microbial-derived biosynthesis and bioenergy  
28 transformations. Despite the wide distribution of Marine Benthic Group-E archaea (referred to as  
29 Hydrothermarchaeota) in hydrothermal environments, little is known on their genome blueprints and  
30 ecofunctions. Here, we studied four relatively high-completeness (> 80%) metagenome-assembled  
31 genomes (MAGs) from a black smoker chimney and surrounding sulfide sediments in the  
32 Mid-Atlantic Ridge of the South Atlantic Ocean (BSmoChi-MAR) as well as publicly available  
33 datasets. Comparative genomics suggest that Hydrothermarchaeota members have versatile carbon  
34 metabolism, including assimilating proteins, lactate and acetate, degrading aromatics anaerobically,  
35 oxidizing C<sub>1</sub> compounds (CO, formate, and formaldehyde), utilizing methyl-compounds, and  
36 incorporating CO<sub>2</sub> by tetrahydromethanopterin-based Wood–Ljungdahl (WL) pathway and Calvin–  
37 Benson–Bassham (CBB) cycle with type III Ribulose-1,5-bisphosphate carboxylase/oxygenase  
38 (RubisCO). They could oxidize sulfur, arsenic, and hydrogen, and respire anaerobically via sulfate  
39 reduction and denitrification based on genomic evidence. The redundancy of carbon utilizing and  
40 element cycling functions, and the interactive processes of syntrophic and sequential utilization of  
41 substrates from community-level metabolic prediction, enable wide accessibility of carbon and  
42 energy sources to microorganisms. Hydrothermarchaeota members derived important functional  
43 components from the community through lateral gene transfer, and became clade-distinctive on  
44 genome content, which might serve as a niche-adaptive strategy to metabolize potential heavy metals,  
45 C<sub>1</sub> compounds, and reduced sulfur compounds.

46  
47 **Importance:** This study provides comprehensive metabolic insights on Hydrothermarchaeota from  
48 comparative genomics, evolution and community-level aspects. Hydrothermarchaeota synergistically  
49 participates in a wide range of carbon utilizing and element cycling processes with other microbes in  
50 the community. We expand the current understanding of community interactions within hydrothermal  
51 sediment environments, suggesting that microbial interactions driven by functions are essential to  
52 nutrient and element cycling.

53  
54 **Keywords:** Hydrothermarchaeota, Hydrothermal sediments, Metagenome-assembled genomes,  
55 Comparative genomics, Carbon utilization, Element cycling, Community-level interactions, Lateral  
56 gene transfer

57

58 **Background:** The hydrothermal alterations transfer and deliver reduced sulfur compounds, organic  
59 compounds (e.g., C<sub>1</sub> compounds, petroleum compounds, organic acids, and ammonia) and heavy  
60 metals to the surrounding hydrothermal sediments (1-6). Together with deposited sedimentary carbon  
61 compounds, these substrates constitute hydrothermal sediments as a distinct ecological niche,  
62 compared to deep-ocean cold marine sediments and hydrothermal fluids. In hydrothermal-active  
63 Guaymas Basin sediments, microorganisms syntrophically degrade hydrocarbons and lipids, and  
64 metabolic linkages among microbial groups were proposed, such as substrate-level interdependency  
65 between fermentative members and sulfur- and nitrogen-cycling members (6). However, the  
66 diversity and function of hydrothermal environment inhabiting microorganisms, especially archaea,  
67 remain elusive and the community-level microbial interactions within these environment settings still  
68 lack detailed characterization.

69

70 Candidatus Hydrothermarchaeota, originally found on continental slope and abyssal sediments and  
71 termed Marine Benthic Group E (MBG-E) (7), has recently been proposed as a new archaea phylum  
72 (8). A previous study has indicated that Hydrothermarchaeota was an abundant archaea group in the  
73 deep-sea hydrothermal environment, such as Juan de Fuca Ridge flank crustal fluids (9). More  
74 recently, a study combined the analysis of metagenome-assembled genomes (MAGs) and  
75 single-amplified genomes (SAGs) of Hydrothermarchaeota from Juan de Fuca Ridge flank crustal  
76 fluids to evaluate the evolutionary placement and functional potential of this new archaea phylum (8),  
77 which suggests a potential for carboxydrotrophy, sulfate and nitrate reduction of  
78 Hydrothermarchaeota (8). Additionally, another metabolic potential analysis based on  
79 Hydrothermarchaeota genomes reconstruction from metagenome of Southern Mariana Trough  
80 sulfide deposits also suggests their carboxydrotrophic and hydrogenotrophic lifestyle (10). However,  
81 a relatively small number of available genomes have limited our understanding of the ecological  
82 roles and metabolisms of this widely distributed archaeal lineages.

83

84 Here, we analyzed metagenomes from sulfur-rich hydrothermal sediments at an active deep-sea (2,770  
85 m depth) hydrothermal vent site (black smoker) in the southern Mid-Atlantic Ridge of the South  
86 Atlantic Ocean. (Total S = ~100-450 mg/g, detailed sample information refers to [Supplementary  
87 Information](#)). We obtained two metagenomic libraries from the layer (TVG10) and surrounding  
88 sediments (TVG13) of an active black smoker chimney in the Mid-Atlantic Ridge (BSmoChi-MAR)  
89 of South Atlantic Ocean (38.1 gigabases for TVG10 and 30.3 gigabases for TVG13). *De novo*  
90 metagenome assembling and binning resulted in 140 MAGs (> 50% genome completeness) from 24  
91 microbial groups ([Table S2](#)), including 5 archaeal MAGs and 135 bacterial MAGs. The metabolic  
92 prediction from all resolved MAGs reveals the functional redundancy and syntrophic  
93 substrate-utilizing interactions among microorganisms. As implicated from the four relatively  
94 high-completeness (> 80%) Hydrothermarchaeota genomes from this study, results of a previous  
95 publication (9) and publicly available datasets, we are developing a metabolic scheme of this widely  
96 distributed sedimentary archaeal lineage. Evolutionary analysis suggests the important role of lateral  
97 gene transfer in the niche-adaptation of Hydrothermarchaeota to surrounding environments. This  
98 study provides an advanced insight into the genomics, community-level interactions, and evolution

99 of Hydrothermarchaeota.

100

101

## 102 **Results and discussion**

### 103 **Hydrothermarchaeota as a novel archaeal phylum**

104 Reconstructed archaeal MAGs and scaffolds containing phylogenetically informative genes, at least  
105 3 ribosomal proteins (RPs) or 16S rRNA gene fragments, are summarized in [Table 1](#) and [Table S3](#).

106 Both 16S rRNA and RP phylogenies place Hydrothermarchaeota as a distinct lineage parallel to  
107 other Euryarchaeotal clades, including Thermococci, Methanomicrobia, and Hadesarchaea ([Fig. 1](#)  
108 [and Fig. S1](#)). Within this lineage, the 16S rRNA gene sequences show median sequence identities of  
109 80.8-83.9 %, which supports phylum-level diversity ([Fig. 1](#) and [Table S4](#)). The phylum designation  
110 Hydrothermarchaeota was proposed since all current genomes were obtained from hydrothermal  
111 sediments or fluids (7-9). However, 16S rRNA gene sequence data show that Hydrothermarchaeota  
112 also occur widely in estuarine and marine sediments, wetland and hot spring sediments ([Fig. 1](#)).

113

### 114 **Mixotrophic lifestyle and versatile substrate utilization**

115 We picked four representative Hydrothermarchaeota MAGs of relatively high completeness values (>  
116 80%) from the major three clades for metabolic prediction analysis ([Table 1](#), [Fig. 2](#), [Fig. S3](#) and  
117 [Tables S5, S6, S7](#)). Similar with the previous study (8), almost all Hydrothermarchaeota MAGs  
118 contain the THMPT (tetrahydromethanopterin) based Wood-Ljungdahl pathway (THMPT-WL  
119 pathway), and some components of THF (tetrahydrofolate) based Wood-Ljungdahl pathway  
120 (THF-WL pathway) ([Fig. 2](#)). Since none of them contains the complete genes for THF-WL pathway,  
121 it might be that this pathway is not active in Hydrothermarchaeota ([Fig. 2](#)). THMPT-WL pathway in  
122 Hydrothermarchaeota could function in both directions, either reductively incorporating CO<sub>2</sub> into  
123 acetyl-CoA synthesis or oxidatively converting products from central carbon metabolism (peptide  
124 and sugar carbohydrate degradation) into energy producing pathways. If the former direction is  
125 active, Hydrothermarchaeota probably lives a mixotrophic lifestyle on using both inorganic and  
126 organic carbon sources. Hydrothermarchaeota does not have the methyl coenzyme M reductase  
127 (MCR) for methane metabolism, but JdFR-18 could incorporate a variety of methyl-containing  
128 compounds into WL pathway, including mono-/di-/trimethylamine and methanol, which is frequently  
129 discovered in members of Methanosarcinales, Methanomassiliicoccales, Methanofastidiosa,  
130 Bathyarchaeota and Verstraetearchaeota (11). Particularly, JdFR-18 (Clade 1) contains HdrD (3  
131 copies) and GlcD (4 copies, FAD-containing dehydrogenase, similar to D-lactate dehydrogenase)  
132 with one pair of them collocated, which is responsible for heterodisulfide reduction linked to lactate  
133 utilization. This gene arrangement and function is also present in *Archaeoglobus fulgidis*,  
134 Bathyarchaeota, and Verstraetearchaeota (11-13).

135

136 Hydrothermarchaeota genomes probably encode full TCA cycle, but not beta-oxidation pathway  
137 (only acquiring acetyl-CoA C-acetyltransferase coding genes, [Fig. 2](#)). Benzoyl-CoA reductase  
138 subunits (BcrBC) encoding genes are present in HyVt-292 and JdFR-18, indicating the presence of  
139 ATP-dependent benzoyl-CoA degradation. Benzoyl-CoA is the central intermediate in anaerobic  
140 degrading pathways of many aromatics, including benzene, phenol, 4-OH-benzoate, cresols,



141 phenylacetate, ethylbenzene and etc. (14). Three out of four Hydrothermarchaeota MAGs contain  
142 vanillate/4-hydroxybenzoate decarboxylase subunit C (BsdC) and flavin prenyltransferase (UbiX),  
143 further supporting that phenol degradation is possible for them. The existence of both ADP-forming  
144 acetyl-CoA synthetase (Acd, EC:6.2.1.13) and acetyl-CoA synthetase (Acs, EC:6.2.1.1) suggests the  
145 feasibility of both acetate fermentation and acetogenesis. Further fermentation from acetaldehyde (by  
146 Aor) to ethanol (by alcohol dehydrogenase, AdhP/AdhE) has also been discovered in some  
147 Hydrothermarchaeota MAGs (Fig. 2).

148

### 149 **C<sub>1</sub> oxidation and other element cycling capacities**

150 Hydrothermarchaeota could anaerobically oxidize CO for ferredoxin generation, with the existence  
151 of carbon monoxide dehydrogenase catalytic subunit (CooS) (Clade 3) (8, 15). NAD<sup>+</sup>-dependent  
152 formate dehydrogenase operon of fdsABG exists in both JdFR-18 and HyVt-292, indicating  
153 Hydrothermarchaeota could use formate as bioenergy source for electron-transferring  
154 phosphorylation (16). The fused 3-hexulose-6-phosphate synthase/6-phospho-3-hexuloisomerase  
155 (Hps-Phi) and bifunctional enzyme Fae-Hps are responsible for formaldehyde fixation in  
156 ribulose-monophosphate cycle (part of PPP pathway) and generation of methylene-H<sub>4</sub>MPT  
157 (THMPT-WL pathway) (EC:4.2.1.147, 4.1.2.43) (3), which are responsible for further biosynthesis  
158 of generating ribose and acetyl-CoA, respectively. C<sub>1</sub> compounds of various redox states are  
159 common (CO, formate) or potentially available (formaldehyde) through geochemical reactions in  
160 hydrothermal environments (1-4). Additionally, CO could also be generated by some anaerobes (4).  
161 Combined with CO<sub>2</sub> fixation ability as described above (CBB cycle and WL pathway), the  
162 mixotrophic lifestyle possibly makes Hydrothermarchaeota as one of the successful archaeal lineages  
163 within the global benthic environmental settings (17).

164

165 Additionally, the process of sulfide oxidation to sulfate might be possible in Hydrothermarchaeota  
166 because the encoded dissimilatory sulfite reductase (DsrAB) could also convey sulfide oxidation (8,  
167 18). The existence of key genes in Sox pathway in SZUA-236 (TVG13) suggests that they could also  
168 oxidize thiosulfate for energy yield (Fig. 2). The potential denitrification and sulfate reduction are  
169 enable Hydrothermarchaeota to scavenge diverse organic matters by anaerobic respiration.

170 Presumably, Hydrothermarchaeota could couple nitrate reduction with reduced sulfur compound (S<sup>0</sup>,  
171 S<sup>2-</sup> and S<sub>2</sub>O<sub>3</sub><sup>2-</sup>) oxidation as the energy generating process (19). As heavy metals are commonly  
172 enriched in the hydrothermal environments (20), Hydrothermarchaeota also acquires genomic  
173 components for detoxicating As (V) [arsenate reductase (ArsC) and arsenite/tail-anchored  
174 protein-transporting ATPase (ArsA)] and Hg (II) [mercuric reductase (MerA)]. Meanwhile, they  
175 could also oxidize As (III) [cytomembrane-bound arsenite oxidase subunits (AioB)] (Fig. S2) and  
176 presumably couple the reduction of As (V) with the oxidation of reduced sulfur compounds,  
177 suggesting that the As cycling could be one of their energy metabolisms.

178

### 179 **Co-existence of nucleotide salvage pathway and CBB cycle**

180 Almost all members from Hydrothermarchaeota encode Embden–Meyerhof–Parnas pathway (EMP  
181 pathway) in both glycolysis and gluconeogenesis directions [almost all contain  
182 fructose-1,6-bisphosphatase (FBP) and phosphoenolpyruvate synthase (PEP synthase)/pyruvate

183 phosphate dikinase (PPDK)] (Fig. 2). Within glycolysis direction, the conversion of PEP to pyruvate  
184 (catalyzed by pyruvate kinase) is lacking in all genomes, however, reverse reactions of PEP  
185 synthase/PPDK are reported in some thermophilic archaea, including, *Thermococcus* (Euryarchaeota)  
186 and *Thermoproteus* (Crenarchaeota) (21). All Hydrothermarchaeota clades contain archaeal style  
187 pentose phosphate pathway (PPP pathway), while, besides that, SZUA-236 (TVG13) contains an  
188 incomplete oxidative phase PPP pathway and a non-oxidative phase PPP pathway. The PPP pathway  
189 together with phosphoribosyl pyrophosphate (PRPP) synthesis pathway are anabolic for biosynthesis  
190 of a variety of amino acids, nucleotides and other secondary metabolites, using substrates from  
191 glycolysis (22). They probably fix CO<sub>2</sub> by type III-RubisCO in the Calvin–Benson–Bassham (CBB)  
192 cycle based on genomic prediction (Fig. 2). The lacking of phosphoribulokinase (Prk) of CBB cycle  
193 is frequently seen in archaeal genomes (23); meanwhile, some reports based on metabolic  
194 experiments indicate the presence of autotrophic activity of crenarchaeotal CBB cycles despite  
195 lacking Prk, suggesting potential existence of its function in Hydrothermarchaeota (24). The  
196 existence of nucleotide salvage pathway and CBB cycle suggests that Hydrothermarchaeota could  
197 recover the RNA/DNA degradation products (adenosine monophosphate, AMP) into glycolysis or  
198 cycle them back into PPP pathway for biosynthesis (Fig. 2) (25). Beside the RNA/DNA degradation,  
199 AMP could also be originated from activities of i) AMP-forming adenylylsulfate reductase during  
200 sulfate reduction (Clade 1, 2), ii) PRPP synthesis process (all clades), iii) ADP-dependent  
201 (AMP-forming) phosphofructokinase/glucokinase (Clade 3) during glycolysis (26-28). The genomic  
202 components of type III-RubisCO and nucleotide salvage function are currently found in other  
203 euryarchaeotal groups, including, Archaeoglobi, Halobacteria, Thermococci, Hadesarchaea, and  
204 euryarchaeotal methanogens (1). Unconventional participation of type III-RubisCO in nucleotide  
205 salvage function suggests the primary function of type III-RubisCO in early ages of archaea  
206 evolution (1, 25).

207

### 208 **Limited carbohydrate assimilation while being protein/peptide degraders**

209 No potential sugar and carbohydrate transporters have been discovered among the major three clades  
210 of Hydrothermarchaeota (Fig. 2) and they encode limited functions of carbohydrate assimilation and  
211 transformation, only including galactose degradation and glycogen conversion. The annotation of  
212 CAZys also suggests they have limited capacity in carbohydrate utilization, among which serine-type  
213 endopeptidase S08A is the dominant extracellular peptidase from both metagenome and  
214 metatranscriptome of MG-I, -II and -III archaea of deep-sea hydrothermal plume (29); S49C is the  
215 archaeal signal peptide peptidase for destructing cleaved signal peptides; C26 is the gamma-glutamyl  
216 hydrolase and probably acquires the glutamine amidotransferase activity (Tables S5, S6, S7).  
217 Meanwhile, genomic predictions indicate that Hydrothermarchaeota (from Clade 1 and 3) have  
218 various peptide/amino acid transporters, and all the major three clades acquire six groups of  
219 aminotransferases for transferring amino residues (Tables S5, S6, S7), and pyruvate ferredoxin  
220 oxidoreductase (Por), indolepyruvate ferredoxin oxidoreductase (Ior), 2-oxoglutarate/2-oxoacid  
221 ferredoxin oxidoreductase (Kor) and pyruvate dehydrogenase, dihydrolipoamide dehydrogenase for  
222 assimilating 2-oxo acids (pyruvate) to succinyl-CoA (acetyl-CoA) and replenishing the energy pool  
223 of reducing equivalents. The existence of encoded proteins of various peptide/amino acid  
224 transporters and endopeptidases/aminotransferases suggests that Hydrothermarchaeota use detrital

225 peptides/proteins as one of the main carbon and energy sources.

226

### 227 **Function redundancy and community level interactions**

228 We have analyzed the metabolic capacities of all reconstructed MAGs (Fig. 3 and Tables S2, S8) to  
229 investigate microbial community interactions. Acidobacteria, Bacteroidetes, and Gemmatimonadetes  
230 acquire the most abundant genes encoding for extracellular peptidases; they are presumably the  
231 major players in utilizing detrital proteins from marine sediments. Other microbial groups could form  
232 syntrophic interactions with them for assimilating extracellular peptides/proteins using the  
233 extracellular peptidases secreted by them. Furthermore, Ignavibacteriae, Planctomycetes, and  
234 Spirochaetes acquire the most abundant genes encoding for glycoside hydrolases, suggesting that  
235 they are the major players in carbohydrate/sugar utilization. Besides, a variety of microbial groups  
236 are predicted to acquire degrading/utilizing ability on methane, fatty acids, aromatics, methanol, and  
237 mono-/di-/trimethylamine. The fermentation products probably include acetate, hydrogen, lactate,  
238 and ethanol. The electron pools generated through the fermentation steps are delivered to terminal  
239 electron acceptors or CO<sub>2</sub> for either respiration or C fixation. Moreover, the fermentation products  
240 from the first fermentation process could also be re-utilized by the community members as energy  
241 and carbon sources. The interaction among microorganisms of syntrophic and sequential (step by  
242 step) utilization of substrates enables the community to gain more energy from a wide range of  
243 substrates.

244 The major eight microbial groups (with at least one MAG from this group acquiring genome  
245 coverage > 15×, including Acidobacteria, Alphaproteobacteria, Bacteroidetes, Candidate Phyla  
246 Radiation, Deltaproteobacteria, Gammaproteobacteria, Hydrothermarchaeota, Nitrospirae) are  
247 predicted to acquire multiple functions on sulfur cycling, including sulfide oxidation, sulfur  
248 oxidation, thiosulfate oxidation, and sulfate reduction, thiosulfate disproportionation. The oxidized  
249 sulfur compounds (SO<sub>4</sub><sup>2-</sup>, SO<sub>3</sub><sup>2-</sup> and S<sub>2</sub>O<sub>3</sub><sup>2-</sup>), as well as nitrate/nitrite and molecular oxygen [except  
250 for Candidate Phyla Radiation (CPR) and Hydrothermarchaeota], could serve as the terminal  
251 electron acceptors for respiration on organic or inorganic energy sources (Table S8). This suggests  
252 that microorganisms in the chimney layers and surrounding sediments of BSmoChi-MAR acquire  
253 various strategies adapting to microaerobic to anoxic environment settings. Besides of  
254 Hydrothermarchaeota, several other microbial groups are also predicted to oxidize multiple C<sub>1</sub>  
255 compounds and acquire C fixation capacity in their genome contents; in addition, some of these  
256 microbial groups are probably capable for carbohydrate and peptide/protein degradation and acquire  
257 sulfur cycling and denitrification abilities, such as Alpha-/Delta-/Gammaproteobacteria and  
258 Nitrospirae (Fig. 3 and Table S8). It is suggested that the redundancy of carbon utilizing and element  
259 cycling functions of microorganisms and the interactive processes of syntrophic and sequential (step  
260 by step) utilization of substrates among microorganisms enable a wide range of substrates and energy  
261 sources to be accessible to the community.

262

### 263 **Comparative genomics**

264 We chose representative genomes from euryarchaeotal groups and Hydrothermarchaeota to compare  
265 the metabolic capacities among them. Peptide degradation capacities are shared among most  
266 Hydrothermarchaeota and euryarchaeotal groups, while, the other carbohydrate degrading/utilizing

267 capacities on starch/glycogen, aromatics, fatty acids, methanol, and mono-/di-/trimethylamines are  
268 patchily distributed (Fig. 4, Figs. S3, S4 and Table S9). Hydrothermarchaeota acquires considerably  
269 complete functions in the cycling of N and S and could oxidize three important C<sub>1</sub> compounds,  
270 comparing to the euryarchaeotal groups. When it comes to within phylum level, we found the  
271 distinction of metabolic traits among three major clades within Hydrothermarchaeota (Fig. 4). Clade  
272 1 MAG (from subsurface fluids from SubFlu-JdFR) specifically acquires utilizing ability on  
273 methanol, methanethiol, and mono-/di-/trimethylamines, which is not shared with other clades,  
274 probably indicating potential supply of methyl-compounds in the surrounding environments. Clade 3  
275 MAGs (SZUA-158 from TVG10, the chimney layer sample, of BSmoChi-MAR and HyVt-292 from  
276 sulfide deposits of Southern Mariana Trough) acquire sulfide oxidation ability (DsrAB) as the major  
277 sulfur cycling function, probably being attributed to the high supply of sulfide in the surrounding  
278 environments. Presumably, Clade 3 could also depend more on sulfide oxidation for energy and  
279 acquire less sugar carbohydrate degrading enzymes (Fig. 2). It provides a clue that each clade could  
280 acquire metabolic traits related to niche adaptation.

281

### 282 **Clade-distinctive lateral gene transfers**

283 We mapped the minimum parsimony-based prediction of gene gain and loss events of inferred gene  
284 ortholog groups (OGs) to the RP-based phylogenomic tree (Fig. 5 and Fig. S5). The  
285 phylogenomically close-related seven euryarchaeotal classes or orders were included, acquiring both  
286 methanogens and non-methanogens. The key gene gain events at node 28, 26 and 24 (occupying  
287 24.9%, 6.7% and 29.1% of the ancestral genomes) indicate that the important traits of extant  
288 Hydrothermarchaeota are derived from lateral gene transfers (LGTs); they include the C<sub>1</sub> oxidation  
289 on formaldehyde and CO, the key component of Wood–Ljungdahl pathway for CO<sub>2</sub> fixation and  
290 acetyl-CoA synthesis, nitrogen and sulfur cycling, aromatic degradation and Hg and As reduction.  
291 The gene gain events at node 27 (occupying 27.9% of the genome) probably provide JdFR-18  
292 abilities on utilizing tri-/mi-/monomethylamines, acetogenesis and other functions on nitrogen and  
293 sulfur cycling (Table S10). The lost OGs at these nodes mainly acquire functions related to amino  
294 acid transport and metabolism, energy production and conversion, and transcription and translation  
295 related metabolisms (Table S10 and Fig S6). As we have indicated above, it might be the adaptive  
296 strategy of Hydrothermarchaeota to derive functional components from the lateral gene interactions  
297 among community members in hydrothermal environments, which are characterized with plenty of  
298 heavy metals, C<sub>1</sub> compounds, and reduced sulfur compounds (1-6, 19, 20, 30). The distinctive  
299 metabolism of each clade (Figs 4, 5 and Tables S11, S12) on C, H, N, and S could also be due to  
300 LGT events in the adapting process within corresponding eco-niches. The OG component pattern  
301 tells that although Hydrothermarchaeota could not produce methane, they are close to the anaerobic  
302 wastewater treatment inhabiting methanogenic phylum Methanofastidiosa (Fig. S7), which is also  
303 consistent to the RP-based phylogenomic tree. Nevertheless, the derived functions through LGT  
304 probably make Hydrothermarchaeota distinctive and become the hydrothermal environment-adaptive  
305 archaeal lineage.

306

### 307 **Conclusions**

308 Hydrothermarchaeota is the widespread archaeal lineage among the archaeal members in the

309 hydrothermal sediment environments. Within the microbial community, Hydrothermarchaeota  
310 synergistically participates in a wide range of carbon utilizing and element cycling processes with  
311 other microbes. This study suggests that microbial interactions are essential to nutrient and element  
312 cycling, and extends the current understanding of community interactions within hydrothermal  
313 sediment environments (6, 31). Our findings call for further genomic studies of  
314 Hydrothermarchaeota from other environments, including estuarine, wetland and spring sediments,  
315 and genomic, transcriptomic and enzymatic studies by cultivation-based experiments to study their  
316 metabolic capacities and activities.

317

## 318 **Materials and Methods**

319 **Sample information and metagenome sequencing.** Marine hydrothermal sediment samples were  
320 retrieved from an active deep-sea hydrothermal vent site (black smoker) of 2,770 m depth in the  
321 Mid-Atlantic Ridge of South Atlantic Ocean, during the cruise of DY125-26 by R/V Dayang Yihao  
322 (Ocean No. 1) at August 2012 (32). TVG10 was sampled from the layer from a black smoker  
323 chimney, and TVG13 was a sulfide sediment sample collected near the black smoker chimney.  
324 Samples were stored in -80°C for subsequent metagenome sequencing, and physicochemical  
325 characterizations were conducted soon after collection, which included total C, H, S, C/N ratio and  
326 pH (32) (Experimental details and results refer to the previous work).

327

328 **Metagenome processing and genome-resolved binning.** In order to get high quality archaeal  
329 metagenome-assembled genomes (MAGs), a custom processing method with two rounds of  
330 assembling and binning was adopted. The metagenomes were sequenced by Illumina HiSeq 2000  
331 platform, two separated libraries for each sample were obtained and combined into one in the  
332 downstream analysis. Raw reads were firstly dereplicated and processed by Sickle  
333 (<https://github.com/najoshi/sickle>) for trimming reads of low quality with default settings. Clean  
334 reads for each sample were subjected to *de novo* metagenome assembly by IDBA-UD v1.1.1 with  
335 '--mink 52 --maxk 92 --step 8' settings (33). The initially resulted assemblies were deposited to  
336 DOE-JGI IMG (The Integrated Microbial Genomes system of US Department of Energy-Joint  
337 Genome Institute) database and annotated by the DOE-JGI Microbial Genome Annotation Pipeline  
338 (MGAP v.4) (34).

339

340 Assemblies were subjected to a MetaBAT v0.32.4 based binning with 12 combinations of parameters  
341 (35), subsequently, Das-Tool v1.0 was applied to screen MetaBAT bins, resulting with high quality  
342 and completeness bins (36). CheckM v1.0.7 was used to assess the bin quality and phylogeny (37).  
343 All above resulted archaeal MAGs were combined with i) all available archaeal genomes from  
344 GenBank database (Aug 2, 2017 updated), ii) archaeal clones, fosmids and cosmids sequences from  
345 NCBI Nucleotide database (Aug 2, 2017 updated), iii) initial assembled scaffolds with one or more  
346 ORFs annotated as archaeal origin by IMG database (Only assemblies obtained in this study), as the  
347 reference for reads mapping. BBmap was used to get potential archaeal reads from raw reads with  
348 'vslow minid = 0.6' option (38). The second round of assembling by archaeal reads was the same as  
349 the above method, and potential 'archaea related scaffolds' were also subjected to DOE-JGI IMG



350 database to get annotated as described above. The same ‘MetaBAT+Das-Tool’ method was used to  
351 get the second round of MAGs, and only archaeal MAGs with high quality were used for  
352 downstream analysis. Outlier scaffolds with abnormal coverage, tetranucleotide signals and GC  
353 pattern within potential high contamination MAGs (checked by CheckM) and erroneous SSU  
354 sequences within MAGs were screened out and decontaminated by RefineM v0.0.20 with the default  
355 settings (39). Average genome coverages were calculated by remapping raw reads to MAGs using  
356 Bowtie2 v2.2.8 (40). The bacterial MAGs were obtained using the similar binning and  
357 decontamination processes, but with only one-round binning. Further refinement was also conducted  
358 by manual inspection based on VizBin for selective MAGs (41).

359  
360 SRA information was obtained by searching string “(((hydrothermal) AND metagenomic[Source])  
361 AND WGS[Strategy])) NOT 16S[Title] NOT 454 GS[Text Word] AND (metagenome[Organism] OR  
362 hydrothermal vent metagenome[Organism] OR marine sediment metagenome[Organism] OR marine  
363 metagenome[Organism] OR subsurface metagenome[Organism])” (Dec 26, 2017 updated) for  
364 hydrothermal vent sediment studies and “(((spring sediment) AND metagenomic [Source]) AND  
365 WGS[Strategy])) NOT 16S[Title] NOT 454 GS[Text Word]” (Jan 24, 2018 updated) for freshwater  
366 spring sediment studies deposited in NCBI-SRA. Searching results were manually inspected to  
367 confirm (Table S1). The linked DOE-JGI IMG deposits to these SRA deposits were found and the  
368 assemblies are used. MAGs originated from hydrothermal vent sediments (21 studies) and freshwater  
369 spring sediments (22 studies) were reconstructed from these public NCBI-SRA deposits and the  
370 linked DOE-JGI IMG deposits (Only one study has the IMG record but no SRA record. This study  
371 was also manually inspected to meet the searching criterion). SRA runs within one ‘Experiment’ and  
372 studies for one ‘Biosample’ are subjected to integrated assembling. Assembling was conducted by  
373 MEGAHIT v1.1.2 (42) with kmer iterations of k35-k75, k45-k95, k65-k145, k145k-k295 for 85bp,  
374 100bp, 150bp, and 300bp reads and the kmer step of 10; the pre-processing was the same as  
375 described above. Studies which have DOE-JGI IMG deposits were simply used with their assembled  
376 metagenomes and QC-passed reads. The downstream binning methods were the same as described  
377 above but with one-round binning. Further refinement was also conducted by manual inspection  
378 based on VizBin for selective MAGs (41).

379



380 **Archaeal MAGs annotation.** KO annotation was made by GhostKOALA v2.0, KAAS v2.1 and  
381 eggNOG-mapper v4.5.1 (Use its first KO hit and COG hit, COG were translated to KO by  
382 'ko2cog.xl' provided by KEGG database) (43-45). Annotation by NCBI nr database (Mar 6, 2017  
383 updated) was done by extracting the first meaningful hit (meaningful information rather than  
384 'hypothetical proteins'). Peptidases were called by MEROPS (Use its 'pepunit' database for less  
385 false positive hits) via DIAMOND BLASTP v0.9.10.111 with '-k 1 -e 1e-10 --subject-cover 80 --id  
386 50' settings (46, 47). Carbohydrate-active enzyme (CAZy) annotation was carried out by dbCAN  
387 (version 20170913) and interpreted by CAZy database (self-parsed online information) (48, 49).  
388 InterProScan 5.26-65.0 (client version) was applied to classify protein functions with annotations  
389 including, CDD, PfamA, SMART, TIGRFAM, Phobius, and SuperFamily(50). Phobius,  
390 PRED-SIGNAL and PSORTb v3.0.2 (Archaea) were applied to predict the location of peptidases, as  
391 'Membrane/Intracellular' or 'Extracellular' (Only congruent results of 'Extracellular' location in all 3  
392 methods were adopted, while, others with incongruent results were assigned as  
393 'Membrane/Intracellular') (51-53).

394  
395 **Major allele frequency analysis.** The anvi'o v4.0 was used to identify and profile single-nucleotide  
396 variants (SNVs) of Hydrothermarchaeota MAGs based on mapping the reads from corresponding  
397 metagenomes. The characterizing strategies for identifying SNVs are operated according to the  
398 instruction (<http://merenlab.org/2015/07/20/analyzing-variability/>). The major allele frequency value  
399 was the percentage of metagenomic reads mapping to a certain site with the majority SNV.

400  
401 **Comparative genomic analysis.** The Markov Cluster (MCL) Algorithm implemented in anvi'o v4.0  
402 was applied for protein clustering (54). The eggNOG-mapper v4.5.1 was used to annotate MAGs  
403 with default settings (44, 45). COG functional categories and orthologous groups parsed from  
404 eggNOG mapping results were used to reconstruct the inner tree. The existence of specific functions  
405 or pathways was assigned according to the existence of marker genes (Use the annotation results  
406 from the above section). Average nucleotide identity (ANI) values among Hydrothermarchaeota  
407 MAGs were calculated by OrthoANI with default settings (55).

408

409 **Phylogenetic reconstruction.** Searching for sequences in SILVA SSU128 for long Marine Benthic  
410 Group E (Hydrothermarchaeota) sequences with good quality (pintail quality > 75%, sequence  
411 length > 1000 nt and sequence quality > 75%) resulted in 549 sequences (assigned as  
412 Hydrothermarchaeota backbone tree, “HydroBTree”) (56). The obtained alignment was subjected to  
413 clustering by mothur (57). 36 OTU representative sequences at 90% similarity cutoff were obtained.  
414 Representative sequences in SSURef\_NR99\_128\_SILVA database and archaeal 16S rRNA gene  
415 sequences retrieved from metagenomic scaffolds (curated by IMG database) and MAGs were  
416 combined (only sequence length > 300bp being considered), and subsequently, subjected to aligning  
417 by SINA v1.2.11 (58). The updated 16S rRNA genes from Pacearchaeota and Asgard superphylum  
418 genomes (deposited in NCBI Genome database) were also included in the tree construction. The  
419 SINA alignment with *Escherichia coli* K12 as the outgroup was filtered by both ssuref:archaea  
420 (LTPs128\_SSU) and 50% consensus filters, and subsequently used for tree construction by  
421 RAxML-HPC v.8 on XSEDE implemented in CIPRES, with settings as GTRCAT and 1000  
422 bootstrap iterations (59, 60).

423  
424 The 16S rRNA gene sequences (> 300bp) which were BLASTed out from the Hydrothermarchaeota  
425 MAGs constructed from NCBI SRAs, the previous publication and this study were aligned by SINA  
426 v1.2.11 (58) and inserted into the “HydroBBTree” by “ARB\_PARSIMONY quick-add species”  
427 method in ARB (61) (Some MAGs have no 16S rRNA gene sequences, which is normal, due to the  
428 low MAG completeness). The topology of this 16S rRNA gene tree remains unchanged compared to  
429 that of “HydroBBTree” and the division of clades also remains unchanged.

430  
431 The masked alignment of 12 ribosomal proteins (processed by CheckM, including, L2, L3, L4, L5,  
432 L14, L16, L18, L22 and S3, S8, S17, S19 ribosomal proteins) were concatenated and then subjected  
433 to the tree model selection by ProtTest 3 (37, 62). Representative archaeal genomes and reported  
434 Hydrothermarchaeota MAGs were included in the tree together with MAGs and scaffolds from this  
435 study (63). A pre-selection was imposed on the concatenated alignment to filter those sequences with  
436 less than 3 ribosomal proteins and less than 25% alignment columns; columns with more than 50%  
437 gaps were trimmed. The RAxML-HPC v.8 on XSEDE implemented in CIPRES was applied to make  
438 the phylogenetic tree with the best model as PROTGAMMAILG and 1000 bootstrap iterations (59,  
439 60). *Escherichia coli* K12 genome was adopted as the outgroup (64).

440

441 **Evolutionary analysis.** The genomes from phylogenetically close-related archaeal orders/classes  
442 were acquired from NCBI Genome database, including methanogenic Methanobacteriales,  
443 Methanococcales, Methanofastidiosa and Methanopyri, and non-methanogenic Theionarchaea,  
444 Hadesarchaea, and Thermococcales. One Crenarchaeota (*Acidilobus saccharovorans* str. 345-15)  
445 genome was used as the outgroup. The genome picking criterion is that they are over 80%  
446 completeness and less than 10% genome contamination, with only exceptions of two Theionarchaea  
447 genomes (the only two available genomes within the class) and one Hadesarchaea genome (77.6%  
448 completeness; one out of two genomes within the class); and genomes are from different families or  
449 genera if possible. The phylogenomic tree of acquired 50 genomes were constructed with the  
450 concatenated masked alignment of 12 ribosomal proteins by the same method as described above,  
451 but using IQ-TREE v1.6.3 (with better performance) (65) with the settings as “-m MFP -mset  
452 LG,WAG -mrate E,I,G,I+G -mfreq FU -bb 1000”.

453  
454 The ortholog groups (OGs) of protein-encoding genes shared by 50 genomes were parsed out by  
455 OrthoFinder v2.2.6 (66) with orphan genes (only existing in one genome) not included in OGs. The  
456 BadiRate was used to estimate OG turnover rate using the BDI-FR-CSP model (Turnover  
457 rates-Branch model-Estimating procedure, stringent on estimating turnover rates) (67) with the above  
458 phylogenomic tree as the input tree file. The output gene turnover results were parsed to OG turnover  
459 results by a custom Perl. The OGs were annotated by eggNOG-mapper v4.5.1; each was assigned  
460 with the majority annotation result. The key OG turnover events on Hydrothermarchaeota nodes  
461 were parsed; the related genes with function and pathway annotations were summarized.

462  
463 **Metabolic capacity prediction and comparison.** Genomes of Euryarchaeota and  
464 Hydrothermarchaeota were acquired from NCBI Genome database, and every five representative  
465 genomes (picked from different families if possible) from each archaeal group were used (9). Only  
466 genomes with completeness over 70% were used. If one archaeal group has limited available  
467 genomes (less than five), all the genomes were used, regardless of the completeness. Metabolic  
468 marker genes were retrieved from a custom metabolic gene database and metabolic pathways  
469 annotated in KEGG database (68, 69). The Pfam, TIGRfam and custom metabolic gene database  
470 were used to scan against genomes with suggested cutoff settings; GhostKOALA v2.0, KAAS v2.1,  
471 and eggNOG-mapper v4.5.1 were applied to assign KOs to genomes based on default settings  
472 (43-45). For each metabolic marker gene, we label their presence/absence in archaeal groups as solid  
473 black dots (present in all), solid grey dots (present in some) and blank dots (present in none). For  
474 each metabolic function, if one marker gene appears, we assign the presence of this function. Due to  
475 the limited genomes and low genome completeness (less than 70%) for Hadesarchaea,  
476 Theionarchaea, Syntrophoarchaeum, and MSBL-1, if one metabolic marker gene/metabolic function  
477 appears in any genomes within an individual archaeal group, a solid black dot is used.

478  
479 For the community metabolic analysis on the MAGs from both the metagenomes, the similar  
480 metabolic capacity prediction method was used as described above. The peptidases and  
481 carbohydrate-active enzymes were calculated by counting the MAG completeness and taking  
482 average values of all MAGs within individual microbial groups (0 digits after the decimal point). The

483 presence of specific pathway/function within each microbial group was assigned when this  
484 pathway/function was present in any MAGs within this microbial group. The Fe uptake metabolism  
485 was predicted by the corresponding database (70), using DIAMOND BLASTP v0.9.10.111 with the  
486 settings of '-e 1e-20 --query-cover 80 --id 65' (47).

487

#### 488 **Acknowledgments**

489 We thank the cruise of DY125-26 and all crew members who have participated in sampling deep  
490 ocean sediments.

491

#### 492 **Funding**

493 This work is financially supported by the Natural Science Foundations of China (grant no. 91851105,  
494 31622002, 41776170 and 41606145), the China Ocean Mineral Resources R&D Association  
495 (COMRA) Program (DY135-B2-09), the Science and Technology Innovation Committee of  
496 Shenzhen (grant no. JCYJ20170818091727570) and the Key Project of Department of Education of  
497 Guangdong Province (grant no. 2017KZDXM071).

498

#### 499 **Availability of data**

500 Initial assemblies: IMG: 3300003886 for TVG10 and IMG: 3300003885 for TVG13. Second round  
501 assemblies: IMG: 3300020233 for TVG10 and IMG: 3300020236 for TVG13. The MAGs that were  
502 resolved from this study are deposited under NCBI BioProject PRJNA385762 and PRJNA480137.  
503 The detailed genomic parameters of these assembled genomes are summarized in [Supplementary](#)  
504 [Information](#).

#### 505 **Author's contributions**

506 Z.Z. and M. L. conceived and designed this study. Z.-H. L. and W.X. contributed to sample  
507 collection and physicochemical parameter measurement. Z.Z. processed the sequencing data,  
508 reconstructed metagenome-resolved genomes and performed the downstream bioinformatic analyses.  
509 Y.L., P.J., Z.Z. and M. L. contributed to the bioinformatic infrastructure construction. All the authors  
510 were involved in the manuscript writing and approved the final edition of the manuscript.

511

#### 512 **Ethics approval and consent to participate**

513 Not applicable.

514

#### 515 **Consent for publication**

516 Not applicable.

517

#### 518 **Competing interests**

519 The authors declare that they have no competing interests.

520

521 **Tables**

522 **Table 1. Overview of genomic statistics of archaeal MAGs constructed from this study, the**  
 523 **reference, and NCBI-SRA deposits.**

524

| MAGs                         | Hydrotherm.<br>SZUA-158<br>(TVG10) | Hydrotherm.<br>SZUA-236<br>(TVG13) | Hydrotherm.<br>SZUA-237<br>(TVG13) | Hydrotherm.<br>JdFR-16 | Hydrotherm.<br>JdFR-17 | Hydrotherm.<br>JdFR-18 | Hydrotherm<br>HyVt-292 |
|------------------------------|------------------------------------|------------------------------------|------------------------------------|------------------------|------------------------|------------------------|------------------------|
| Copies of individual markers |                                    |                                    |                                    |                        |                        |                        |                        |
| 0                            | 9                                  | 21                                 | 49                                 | 99                     | 87                     | 2                      | 30                     |
| 1                            | 139                                | 128                                | 136                                | 25                     | 59                     | 145                    | 141                    |
| 2                            | 1                                  | 0                                  | 3                                  | 25                     | 29                     | 2                      | 17                     |
| 3                            | 0                                  | 0                                  | 0                                  | 0                      | 12                     | 0                      | 0                      |
| 4                            | 0                                  | 0                                  | 0                                  | 0                      | 1                      | 0                      | 0                      |
| 5+                           | 0                                  | 0                                  | 0                                  | 0                      | 0                      | 0                      | 0                      |
| Completeness (%)             | 92.53                              | 84.97                              | 65.82                              | 31.93                  | 53.87                  | 98.13                  | 80.43                  |
| Contamination (%)            | 0.93                               | 0.00                               | 1.76                               | 13.55                  | 25.15                  | 1.87                   | 9.06                   |
| Strain heterogeneity (%)     | 0.00                               | 0.00                               | 33.33                              | 84.00                  | 71.83                  | 0.00                   | 35.29                  |
| Bin size (bp)                | 1749358                            | 1270198                            | 1228833                            | 1353114                | 2178134                | 2062134                | 1426722                |
| N50 (bp)                     | 9590                               | 6219                               | 3825                               | 6267                   | 7687                   | 149032                 | 5600                   |
| Mean scaffold length (bp)    | 7706.42                            | 5747.50                            | 3510.95                            | 5614.58                | 6331.78                | 93733.36               | 4988.54                |
| GC (%)                       | 38.99                              | 47.58                              | 45.76                              | 49.68                  | 49.64                  | 39.14                  | 40.02                  |
| GC standard deviation (%)    | 1.91                               | 1.99                               | 2.89                               | 3.92                   | 4.50                   | 1.54                   | 1.98                   |
| Coding density (%)           | 84.96                              | 91.48                              | 84.96                              | 91.98                  | 91.94                  | 92.12                  | 89.88                  |

525

526 “Hydrotherm.” stands for Hydrothermarchaeota. HyVt-292 was reconstructed from a metagenome of  
 527 deep-sea massive sulfide deposits from Southern Mariana Trough (DRR093004), which is  
 528 hydrothermally inactive. JdFR MAGs were reconstructed from Juan de Fuca Ridge flank subsurface  
 529 fluids.

## 530 **Figure Captions**

531 **Figure 1. Phylogenetic tree of 16S rRNA gene from TVG metagenomes.** **a**, The RAxML  
532 maximum likelihood tree was constructed by including metagenome 16S gene sequences (from both  
533 binned and unbinned scaffolds). Sequences from this study are highlighted; the highlighted number  
534 in bracket stands for sequences from this study. Bootstrap values over 75% were labeled. This tree  
535 was rooted by an *Escherichia coli* K12 16S rRNA gene. **b**, Detailed Hydrothermarchaeota 16S rRNA  
536 gene tree. Four clades were established based on 90% similarity cutoff 16S rRNA gene  
537 representative sequences of Hydrothermarchaeota. Sequences from this study are highlighted. **c**,  
538 Schematic figure depicting two sampling locations and with-in group evolutionary distances of 16S  
539 rRNA gene sequences from two samples (calculated by Jukes-Cantor model and pairwise  
540 comparison based on global alignment). “NA” means only one sequence within a group, not  
541 applicable to calculate the with-in group evolutionary distance. **d**, The major allele frequency  
542 diagram representing the diverse level of potential Hydrothermarchaeota in corresponding  
543 environments where the Hydrothermarchaeota MAGs were found. Higher frequency indicates a  
544 majority allele is dominant over the minor ones. Higher mean major allele frequency on the genome  
545 level indicates a less diverse Hydrothermarchaeota population in the environment.

546  
547 **Figure 2. Metabolic pathways of Hydrothermarchaeota.** **a**, Schematic figure showing  
548 metabolisms of four high completeness Hydrothermarchaeota MAGs. **b**, RP tree showing the  
549 phylogeny of all currently available Hydrothermarchaeota MAGs. **c**, Heatmap and barchart depicting  
550 the distribution of extracellular/intracellular peptidases and carbohydrate-active enzymes (CAZys) in  
551 Hydrothermarchaeota MAGs. The barchart shows the summary information of glycoside hydrolases  
552 (GH) family within each functional category.

553  
554 **Figure 3. Metabolic prediction figure for the community of MAGs from TVG metagenomes.**  
555 The peptidases and carbohydrate degrading enzymes were calculated by counting the MAG  
556 completeness and taking average values of all MAGs within individual microbial groups (0 digits  
557 after the decimal point). The presence of specific pathway/function within each microbial group was  
558 assigned when this pathway/function was present in any MAGs within this microbial group. The Fe  
559 uptake metabolism was predicted by the corresponding database. For the metabolic prediction of N,  
560 S cycling, C<sub>1</sub> oxidation, and C fixation, only the major microbial groups (with at least one MAG  
561 from this group acquiring genome coverage > 15×) are represented.

562  
563 **Figure 4. Metabolic capacity comparison between Hydrothermarchaeota and Euryarchaeota.**  
564 Metabolic marker genes from Pfam, TIGRFam and KEGG databases are used to search for up to five  
565 genomes within one archaeal group. Solid black dots, solid grey dots, and blank dots stand for all  
566 present, partially present, and no present in all genomes. If one marker gene appears, it is assumed  
567 that the corresponding metabolic function exists. Due to the limited genomes and low genome  
568 completeness, for Hadesarchaea, Hydrothermarchaeota, Theionarchaea, Syntrophoarchaeum, and  
569 MSBL-1, if genes appear in one genome, solid black dots are used. Detailed summary information  
570 refers to Supplementary Information. The metabolic capacity of five Hydrothermarchaeota MAGs  
571 was also depicted. The RP phylogenetic tree was constructed by picking one random genome from  
572 each group and bootstrap values over 75% were depicted as black dots on the node.



573

574 **Figure 5. The estimation of ortholog group (OG) turnover events for Hydrothermarchaeota**  
575 **and related euryarchaeotal orders and classes.** The OG numbers and inferred OG gain and loss  
576 numbers were labeled accordingly on the tree nodes and tips. The COG category information of the  
577 gained or lost OGs for Hydrothermarchaeota clade was parsed and depicted. The important genes  
578 that were involved with the OG gain events for Hydrothermarchaeota clade were also labeled to the  
579 corresponding nodes.

580

581

582

## 583 References

584

- 585 1. Baker BJ, Saw JH, Lind AE, Lazar CS, Hinrichs K-U, Teske AP, Ettema TJG. 2016. Genomic inference of the  
586 metabolism of cosmopolitan subsurface Archaea, Hadesarchaea. *Nat Microbiol* 1:16002.
- 587 2. Cleaves HJ. 2008. The prebiotic geochemistry of formaldehyde. *Precambrian Res* 164:111-118.
- 588 3. Orita I, Yurimoto H, Hirai R, Kawarabayasi Y, Sakai Y, Kato N. 2005. The archaeon *Pyrococcus horikoshii*  
589 possesses a bifunctional enzyme for formaldehyde fixation via the ribulose monophosphate pathway. *J*  
590 *Bacteriol* 187:3636-3642.
- 591 4. Sokolova TG, Henstra A-M, Sipma J, Parshina SN, Stams AJ, Lebedinsky AV. 2009. Diversity and ecophysiological  
592 features of thermophilic carboxydrotrophic anaerobes. *FEMS Microbiol Ecol* 68:131-141.
- 593 5. Dick G, Anantharaman K, Baker B, Li M, Reed D, Sheik C. 2013. The microbiology of deep-sea hydrothermal vent  
594 plumes: ecological and biogeographic linkages to seafloor and water column habitats. *Front Microbio* 4.
- 595 6. Dombrowski N, Seitz KW, Teske AP, Baker BJ. 2017. Genomic insights into potential interdependencies in  
596 microbial hydrocarbon and nutrient cycling in hydrothermal sediments. *Microbiome* 5:106.
- 597 7. Vetriani C, Jannasch HW, MacGregor BJ, Stahl DA, Reysenbach AL. 1999. Population structure and phylogenetic  
598 characterization of marine benthic archaea in deep-sea sediments. *Appl Environ Microbiol* 65:4375-4384.
- 599 8. Carr SA, Jungbluth SP, Eloë-Fadrosch EA, Stepanauskas R, Woyke T, Rappé MS, Orcutt BN. 2019.  
600 Carboxydrotrophy potential of uncultivated Hydrothermarchaeota from the seafloor crustal biosphere. *ISME*  
601 *J* doi:10.1038/s41396-019-0352-9.
- 602 9. Jungbluth SP, Amend JP, Rappé MS. 2017. Metagenome sequencing and 98 microbial genomes from Juan de  
603 Fuca Ridge flank subsurface fluids. *Sci Data* 4:170037.
- 604 10. Kato S, Nakano S, Kouduka M, Hirai M, Suzuki K, Itoh T, Ohkuma M, Suzuki Y. 2019. Metabolic Potential of  
605 As-yet-uncultured Archaeal Lineages of *Candidatus* Hydrothermarchaeota Thriving in Deep-sea Metal Sulfide  
606 Deposits. *Microbes Environ advpub*.
- 607 11. Vanwonterghem I, Evans PN, Parks DH, Jensen PD, Woodcroft BJ, Hugenholtz P, Tyson GW. 2016.  
608 Methylophilic methanogenesis discovered in the archaeal phylum *Verstraetearchaeota*. *Nat Microbiol*  
609 1:16170.
- 610 12. Hocking WP, Stokke R, Roalkvam I, Steen IH. 2014. Identification of key components in the energy metabolism  
611 of the hyperthermophilic sulfate-reducing archaeon *Archaeoglobus fulgidus* by transcriptome analyses. *Front*  
612 *Microbio* 5:1-20.
- 613 13. Evans PN, Parks DH, Chadwick GL, Robbins SJ, Orphan VJ, Golding SD, Tyson GW. 2015. Methane metabolism in  
614 the archaeal phylum *Bathyarchaeota* revealed by genome-centric metagenomics. *Science* 350:434-438.
- 615 14. Fuchs G, Boll M, Heider J. 2011. Microbial degradation of aromatic compounds - from one strategy to four. *Nat*  
616 *Rev Microbiol* 9:803-816.
- 617 15. González JM, Robb FT. 2000. Genetic analysis of *Carboxydotherrmus hydrogenoformans* carbon monoxide  
618 dehydrogenase genes *cooF* and *cooS*. *FEMS Microbiol Lett* 191:243-247.
- 619 16. Hartmann T, Leimkühler S. 2013. The oxygen-tolerant and NAD<sup>+</sup>-dependent formate dehydrogenase from  
620 *Rhodobacter capsulatus* is able to catalyze the reduction of CO<sub>2</sub> to formate. *The FEBS Journal* 280:6083-6096.
- 621 17. Zhou Z, Liu Y, Lloyd KG, Pan J, Yang Y, Gu J-D, Li M. 2018. Genomic and transcriptomic insights into the ecology  
622 and metabolism of benthic archaeal cosmopolitan, Thermopfundales (MBG-D archaea). *ISME J*  
623 doi:10.1038/s41396-018-0321-8.
- 624 18. Anantharaman K, Hausmann B, Jungbluth SP, Kantor RS, Lavy A, Warren LA, Rappé MS, Pester M, Loy A,  
625 Thomas BC, Banfield JF. 2018. Expanded diversity of microbial groups that shape the dissimilatory sulfur cycle.

- 626 ISME J 12:1715-1728.
- 627 19. Fortunato CS, Larson B, Butterfield DA, Huber JA. 2017. Spatially distinct, temporally stable microbial  
628 populations mediate biogeochemical cycling at and below the seafloor in hydrothermal vent fluids. *Environ*  
629 *Microbiol* 20:769-784.
- 630 20. Vetriani C, Chew YS, Miller SM, Yagi J, Coombs J, Lutz RA, Barkay T. 2005. Mercury adaptation among bacteria  
631 from a deep-sea hydrothermal vent. *Appl Environ Microbiol* 71:220-226.
- 632 21. Bräsen C, Esser D, Rauch B, Siebers B. 2014. Carbohydrate metabolism in Archaea: current insights into unusual  
633 enzymes and pathways and their regulation. *Microbiol Mol Biol Rev* 78:89-175.
- 634 22. Madigan MT, John M. Martinko, Kelly S. Bender, Daniel H. Buckley, and David Allan Stahl. 2015. *Brock Biology of*  
635 *Microorganisms*, Fourteenth edition ed. Pearson, Boston.
- 636 23. Berg IA, Kockelkorn D, Ramos-Vera WH, Say RF, Zarzycki J, Hügler M, Alber BE, Fuchs G. 2010. Autotrophic  
637 carbon fixation in archaea. *Nat Rev Microbiol* 8:447-60.
- 638 24. Hügler M, Huber H, Stetter KO, Fuchs G. 2003. Autotrophic CO<sub>2</sub> fixation pathways in archaea (Crenarchaeota).  
639 *Arch Microbiol* 179:160-173.
- 640 25. Sato T, Atomi H, Imanaka T. 2007. Archaeal type III RuBisCOs function in a pathway for AMP metabolism.  
641 *Science* 315:1003-1006.
- 642 26. Kengen SW, Tuininga JE, de Bok FA, Stams AJ, de Vos WM. 1995. Purification and characterization of a novel  
643 ADP-dependent glucokinase from the hyperthermophilic archaeon *Pyrococcus furiosus*. *J Biol Chem*  
644 270:30453-30457.
- 645 27. Siebers B, Schönheit P. 2005. Unusual pathways and enzymes of central carbohydrate metabolism in Archaea.  
646 *Curr Opin Microbiol* 8:695-705.
- 647 28. Schiffer A, Fritz G, Kroneck PM, Ermler U. 2006. Reaction Mechanism of the Iron-Sulfur Flavoenzyme  
648 Adenosine-5'-Phosphosulfate Reductase Based on the Structural Characterization of Different Enzymatic States.  
649 *Biochemistry* 45:2960-2967.
- 650 29. Li M, Baker BJ, Anantharaman K, Jain S, Breier JA, Dick GJ. 2015. Genomic and transcriptomic evidence for  
651 scavenging of diverse organic compounds by widespread deep-sea archaea. *Nat Commun* 6:8933.
- 652 30. Meier DV, Pjevac P, Bach W, Hourdez S, Girguis PR, Vidoudez C, Amann R, Meyerdierks A. 2017. Niche  
653 partitioning of diverse sulfur-oxidizing bacteria at hydrothermal vents. *ISME J* 11:1545.
- 654 31. Lloyd KG, Schreiber L, Petersen DG, Kjeldsen KU, Lever MA, Steen AD, Stepanauskas R, Richter M, Kleindienst S,  
655 Lenk S, Schramm A, Jorgensen BB. 2013. Predominant archaea in marine sediments degrade detrital proteins.  
656 *Nature* 496:215-8.
- 657 32. Xu W, Li M, Ding J-F, Gu J-D, Luo Z-H. 2014. Bacteria dominate the ammonia-oxidizing community in a  
658 hydrothermal vent site at the Mid-Atlantic Ridge of the South Atlantic Ocean. *Appl Microbiol Biotechnol*  
659 98:7993-8004.
- 660 33. Peng Y, Leung HC, Yiu SM, Chin FY. 2012. IDBA-UD: a de novo assembler for single-cell and metagenomic  
661 sequencing data with highly uneven depth. *Bioinformatics* 28:1420-8.
- 662 34. Markowitz VM, Chen I-MA, Chu K, Szeto E, Palaniappan K, Grechkin Y, Ratner A, Jacob B, Pati A, Huntemann M.  
663 2012. IMG/M: the integrated metagenome data management and comparative analysis system. *Nucleic Acids*  
664 *Res* 40:D123-D129.
- 665 35. Kang DD, Froula J, Egan R, Wang Z. 2015. MetaBAT, an efficient tool for accurately reconstructing single  
666 genomes from complex microbial communities. *PeerJ* 3:e1165.
- 667 36. Sieber CM, Probst AJ, Sharrar A, Thomas BC, Hess M, Tringe SG, Banfield JF. 2018. Recovery of genomes from  
668 metagenomes via a dereplication, aggregation and scoring strategy. *Nat Microbiol* 3:836-843.
- 669 37. Parks DH, Imelfort M, Skennerton CT, Hugenholtz P, Tyson GW. 2015. CheckM: assessing the quality of microbial

- 670 genomes recovered from isolates, single cells, and metagenomes. *Genome Res* 25:1043-1055.
- 671 38. Bushnell B. 2014. BMAP: A Fast, Accurate, Splice-Aware Aligner, abstr Alignment of reads is one of the primary  
672 computational tasks in bioinformatics. Of paramount importance to resequencing, alignment is also crucial to  
673 other areas - quality control, scaffolding, string-graph assembly, homology detection, assembly evaluation,  
674 error-correction, expression quantification, and even as a tool to evaluate other tools. An optimal aligner  
675 would greatly improve virtually any sequencing process, but optimal alignment is prohibitively expensive for  
676 gigabases of data. Here, we will present BMAP [1], a fast splice-aware aligner for short and long reads. We will  
677 demonstrate that BMAP has superior speed, sensitivity, and specificity to alternative high-throughput aligners  
678 bowtie2 [2], bwa [3], smalt, [4] GSNAP [5], and BLASR [6]. The 9th Annual Genomics of Energy & Environment  
679 Meeting, Walnut Creek, CA, March 17-20, 2014. USDOE Office of Science (SC),
- 680 39. Parks DH, Rinke C, Chuvochina M, Chaumeil P-A, Woodcroft BJ, Evans PN, Hugenholtz P, Tyson GW. 2017.  
681 Recovery of nearly 8,000 metagenome-assembled genomes substantially expands the tree of life. *Nat*  
682 *Microbiol* 2:1533-1542.
- 683 40. Langmead B, Salzberg SL. 2012. Fast gapped-read alignment with Bowtie 2. *Nat Methods* 9:357.
- 684 41. Laczny CC, Sternal T, Plugaru V, Gawron P, Atashpendar A, Margossian HH, Coronado S, Van der Maaten L,  
685 Vlassis N, Wilmes P. 2015. VizBin-an application for reference-independent visualization and  
686 human-augmented binning of metagenomic data. *Microbiome* 3.
- 687 42. Li D, Liu C-M, Luo R, Sadakane K, Lam T-W. 2015. MEGAHIT: an ultra-fast single-node solution for large and  
688 complex metagenomics assembly via succinct *de Bruijn* graph. *Bioinformatics* 31:1674-1676.
- 689 43. Moriya Y, Itoh M, Okuda S, Yoshizawa AC, Kanehisa M. 2007. KAAS: an automatic genome annotation and  
690 pathway reconstruction server. *Nucleic Acids Res* 35:W182-W185.
- 691 44. Kanehisa M, Sato Y, Morishima K. 2016. BlastKOALA and GhostKOALA: KEGG tools for functional  
692 characterization of genome and metagenome sequences. *J Mol Biol* 428:726-731.
- 693 45. Huerta-Cepas J, Szklarczyk D, Forslund K, Cook H, Heller D, Walter MC, Rattei T, Mende DR, Sunagawa S, Kuhn  
694 M, Jensen LJ, von Mering C, Bork P. 2016. eggNOG 4.5: a hierarchical orthology framework with improved  
695 functional annotations for eukaryotic, prokaryotic and viral sequences. *Nucleic Acids Res* 44:D286-D293.
- 696 46. Rawlings ND, Barrett AJ, Finn R. 2016. Twenty years of the MEROPS database of proteolytic enzymes, their  
697 substrates and inhibitors. *Nucleic Acids Res* 44:D343-D350.
- 698 47. Buchfink B, Xie C, Huson DH. 2015. Fast and sensitive protein alignment using DIAMOND. *Nat Methods*  
699 12:59-60.
- 700 48. Yin Y, Mao X, Yang J, Chen X, Mao F, Xu Y. 2012. dbCAN: a web resource for automated carbohydrate-active  
701 enzyme annotation. *Nucleic Acids Res* 40:W445-W451.
- 702 49. Lombard V, Golaconda Ramulu H, Drula E, Coutinho PM, Henrissat B. 2013. The carbohydrate-active enzymes  
703 database (CAZy) in 2013. *Nucleic Acids Res* 42:D490-D495.
- 704 50. Jones P, Binns D, Chang H-Y, Fraser M, Li W, McAnulla C, McWilliam H, Maslen J, Mitchell A, Nuka G. 2014.  
705 InterProScan 5: genome-scale protein function classification. *Bioinformatics* 30:1236-1240.
- 706 51. Bagos PG, Tsirigos KD, Plessas SK, Liakopoulos TD, Hamodrakas SJ. 2009. Prediction of signal peptides in  
707 archaea. *Protein Eng Des Sel* 22:27-35.
- 708 52. Yu NY, Wagner JR, Laird MR, Melli G, Rey S, Lo R, Dao P, Sahinalp SC, Ester M, Foster LJ, Brinkman FSL. 2010.  
709 PSORTb 3.0: improved protein subcellular localization prediction with refined localization subcategories and  
710 predictive capabilities for all prokaryotes. *Bioinformatics* 26:1608-1615.
- 711 53. Käll L, Krogh A, Sonnhammer EL. 2007. Advantages of combined transmembrane topology and signal peptide  
712 prediction—the Phobius web server. *Nucleic Acids Res* 35:W429-W432.
- 713 54. Eren AM, Esen ÖC, Quince C, Vineis JH, Morrison HG, Sogin ML, Delmont TO. 2015. Anvi'o: an advanced

- 714 analysis and visualization platform for omics data. *PeerJ* 3:e1319.
- 715 55. Lee I, Ouk Kim Y, Park S-C, Chun J. 2016. OrthoANI: An improved algorithm and software for calculating average  
716 nucleotide identity. *Int J Syst Evol Microbiol* 66:1100-1103.
- 717 56. Quast C, Pruesse E, Yilmaz P, Gerken J, Schweer T, Yarza P, Peplies J, Gloeckner FO. 2013. The SILVA ribosomal  
718 RNA gene database project: improved data processing and web-based tools. *Nucleic Acids Res* 41:D590-D596.
- 719 57. Schloss PD, Westcott SL, Ryabin T, Hall JR, Hartmann M, Hollister EB, Lesniewski RA, Oakley BB, Parks DH,  
720 Robinson CJ. 2009. Introducing mothur: open-source, platform-independent, community-supported software  
721 for describing and comparing microbial communities. *Appl Environ Microbiol* 75:7537-7541.
- 722 58. Pruesse E, Peplies J, Gloeckner FO. 2012. SINA: Accurate high-throughput multiple sequence alignment of  
723 ribosomal RNA genes. *Bioinformatics* 28:1823-1829.
- 724 59. Miller MA, Pfeiffer W, Schwartz T. 2010. Creating the CIPRES Science Gateway for inference of large  
725 phylogenetic trees, abstr Gateway Computing Environments Workshop (GCE), 2010, New Orleans, Louisiana,  
726 USA, IEEE,
- 727 60. Stamatakis A. 2014. RAxML version 8: a tool for phylogenetic analysis and post-analysis of large phylogenies.  
728 *Bioinformatics* 30:1312-1313.
- 729 61. Ludwig W, Strunk O, Westram R, Richter L, Meier H, Yadhukumar, Buchner A, Lai T, Steppi S, Jobb G, Forster W,  
730 Brettske I, Gerber S, Ginhart AW, Gross O, Grumann S, Hermann S, Jost R, Konig A, Liss T, Lussmann R, May M,  
731 Nonhoff B, Reichel B, Strehlow R, Stamatakis A, Stuckmann N, Vilbig A, Lenke M, Ludwig T, Bode A, Schleifer KH.  
732 2004. ARB: a software environment for sequence data. *Nucleic Acids Res* 32:1363-1371.
- 733 62. Darriba D, Taboada GL, Doallo R, Posada D. 2011. ProtTest 3: fast selection of best-fit models of protein  
734 evolution. *Bioinformatics* 27:1164-1165.
- 735 63. Hug LA, Baker BJ, Anantharaman K, Brown CT, Probst AJ, Castelle CJ, Butterfield CN, Hermsdorf AW, Amano Y, Ise  
736 K. 2016. A new view of the tree of life. *Nat Microbiol* 1:16048.
- 737 64. Letunic I, Bork P. 2007. Interactive Tree Of Life (iTOL): an online tool for phylogenetic tree display and  
738 annotation. *Bioinformatics* 23:127-128.
- 739 65. Nguyen L-T, Schmidt HA, von Haeseler A, Minh BQ. 2014. IQ-TREE: a fast and effective stochastic algorithm for  
740 estimating maximum-likelihood phylogenies. *Mol Biol Evol* 32:268-274.
- 741 66. Emms DM, Kelly S. 2015. OrthoFinder: solving fundamental biases in whole genome comparisons dramatically  
742 improves orthogroup inference accuracy. *Genome Biol* 16:157.
- 743 67. Librado P, Vieira FG, Rozas J. 2012. BadiRate: estimating family turnover rates by likelihood-based methods.  
744 *Bioinformatics* 28:279-281.
- 745 68. Anantharaman K, Brown CT, Hug LA, Sharon I, Castelle CJ, Probst AJ, Thomas BC, Singh A, Wilkins MJ, Karaoz U,  
746 Brodie EL, Williams KH, Hubbard SS, Banfield JF. 2016. Thousands of microbial genomes shed light on  
747 interconnected biogeochemical processes in an aquifer system. *Nat Commun* 7:13219.
- 748 69. Kanehisa M, Goto S. 2000. KEGG: kyoto encyclopedia of genes and genomes. *Nucleic Acids Res* 28:27-30.
- 749 70. Toulza E, Tagliabue A, Blain S, Piganeau G. 2012. Analysis of the Global Ocean Sampling (GOS) Project for Trends  
750 in Iron Uptake by Surface Ocean Microbes. *PLoS One* 7:e30931.
- 751





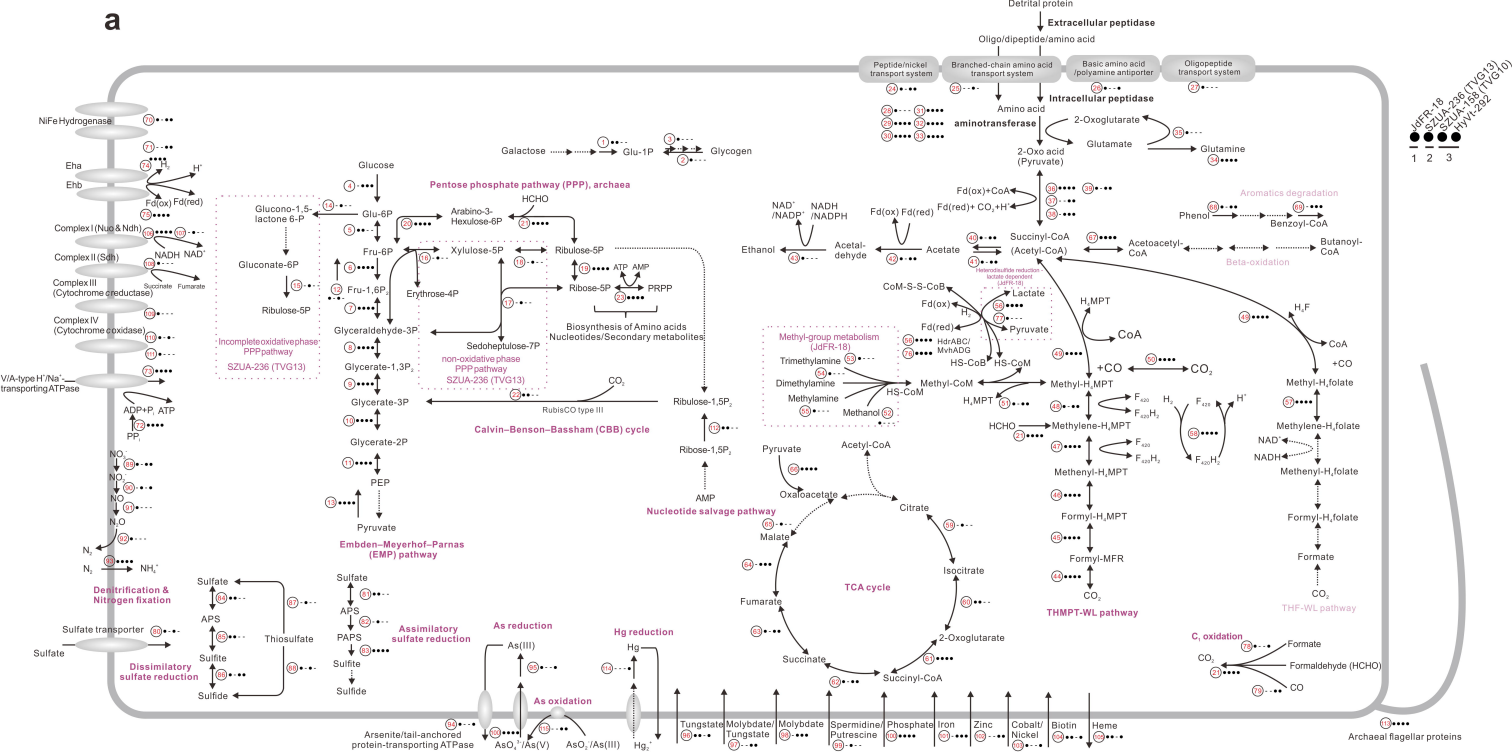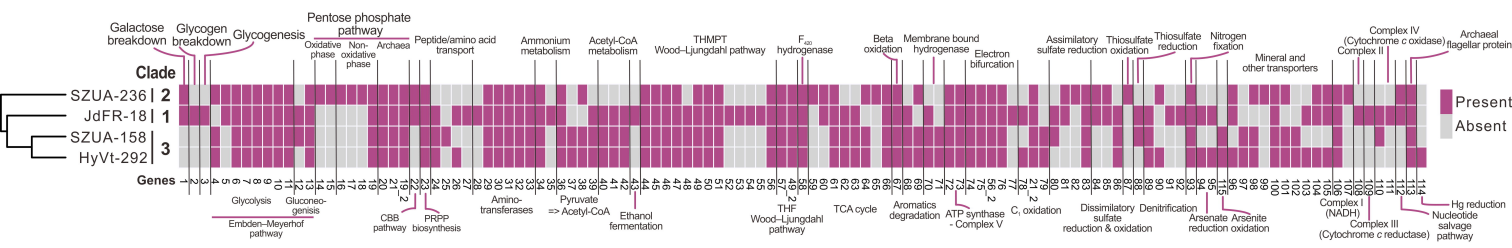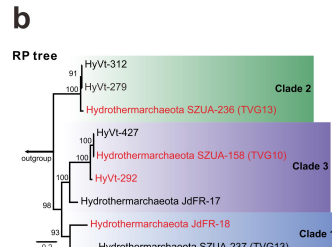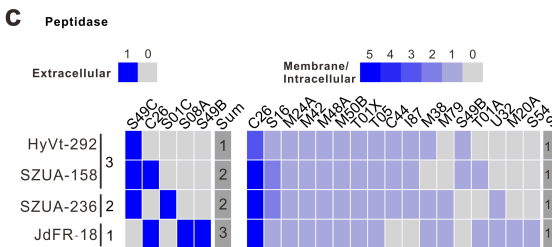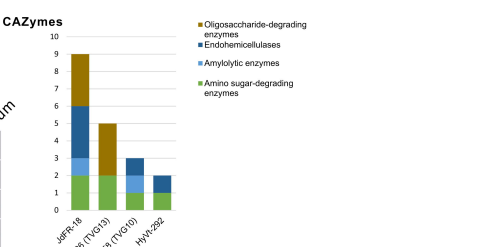

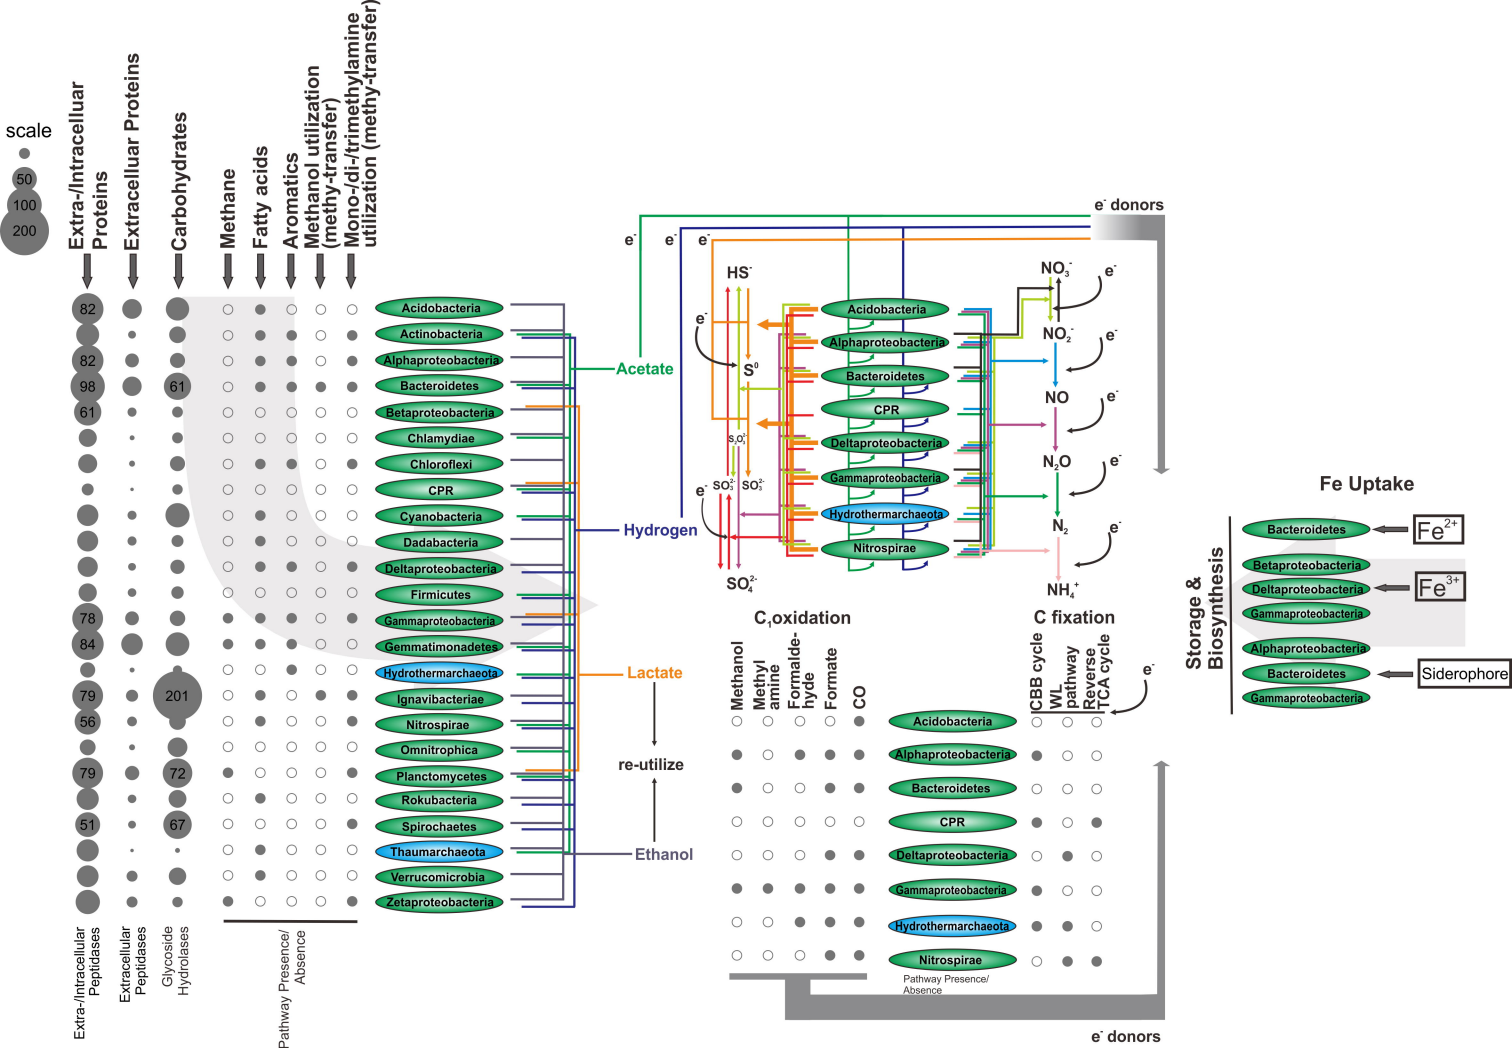

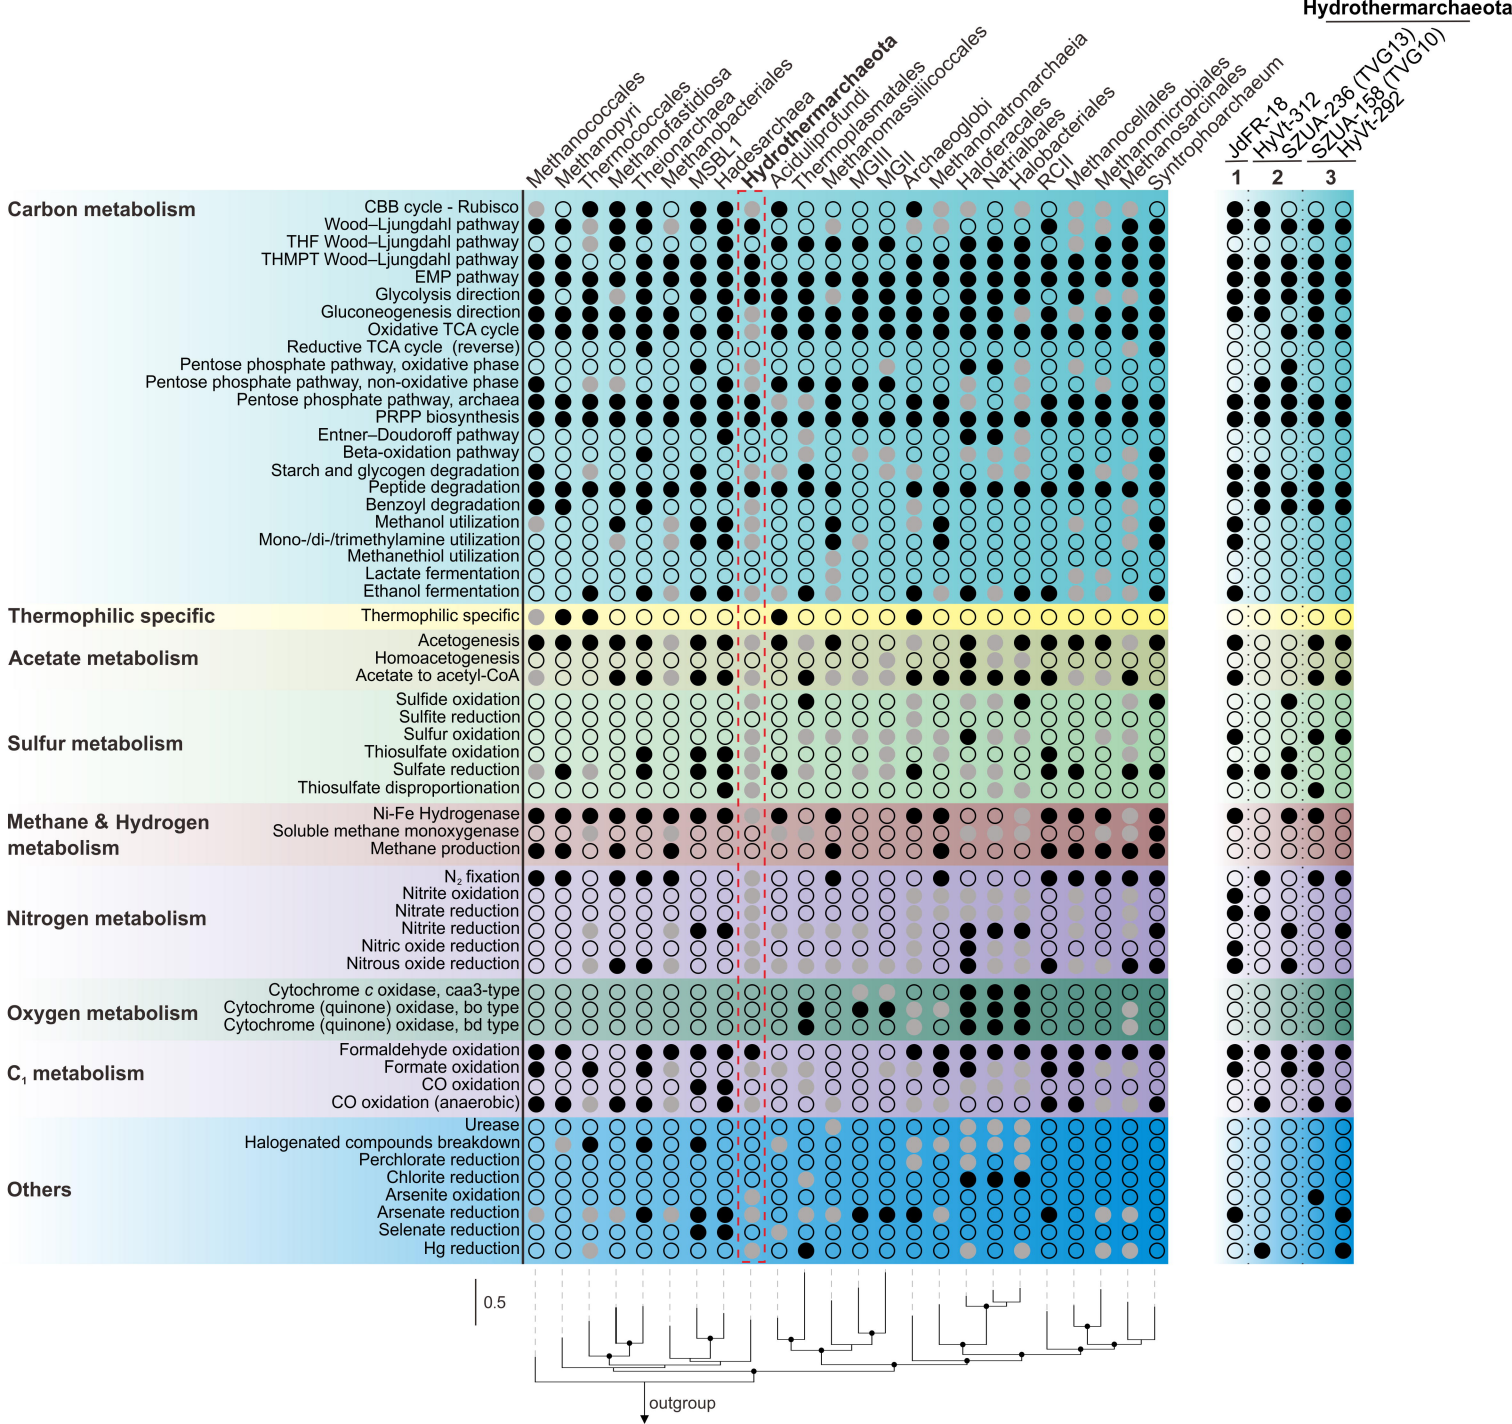



**hps-phi:** C oxidation (Formaldehyde oxidation)  
**cdhABCDE:** Wood-Ljungdahl pathway (acetyl-CoA decarboxylase/synthase complex)  
**nirB:** Denitrification (nitrite reductase)  
**dsrB:** Dissimilatory sulfide oxidation  
**cysH:** Assimilatory sulfate reduction  
**arsA:** Arsenate reduction (arsenite transporter)

**bcrB:** Aromatics degradation (benzoyl-CoA reductase)  
**nifH:** Nitrogen fixation  
**merA:** Hg reduction

**cooS:** C oxidation (anaerobic CO oxidation)  
**nifDK:** Nitrogen fixation  
**narI:** Denitrification (nitrate reductase)  
**dsrA:** Dissimilatory sulfide oxidation  
**cysH:** Assimilatory sulfate reduction  
**arsA:** Arsenate reduction (arsenite transporter)

**accABC:** Acetogenesis  
**mttC:** Trimethylamine utilization  
**mtbC:** Dimethylamine utilization  
**mtmB:** Methylamine utilization  
**narI:** Denitrification  
**TC\_SULP:** Sulfate transporter  
**sat:** Dissimilatory sulfate reduction/oxidation  
**dsrA:** Dissimilatory sulfide oxidation

Gain →

Gene numbers Orphans

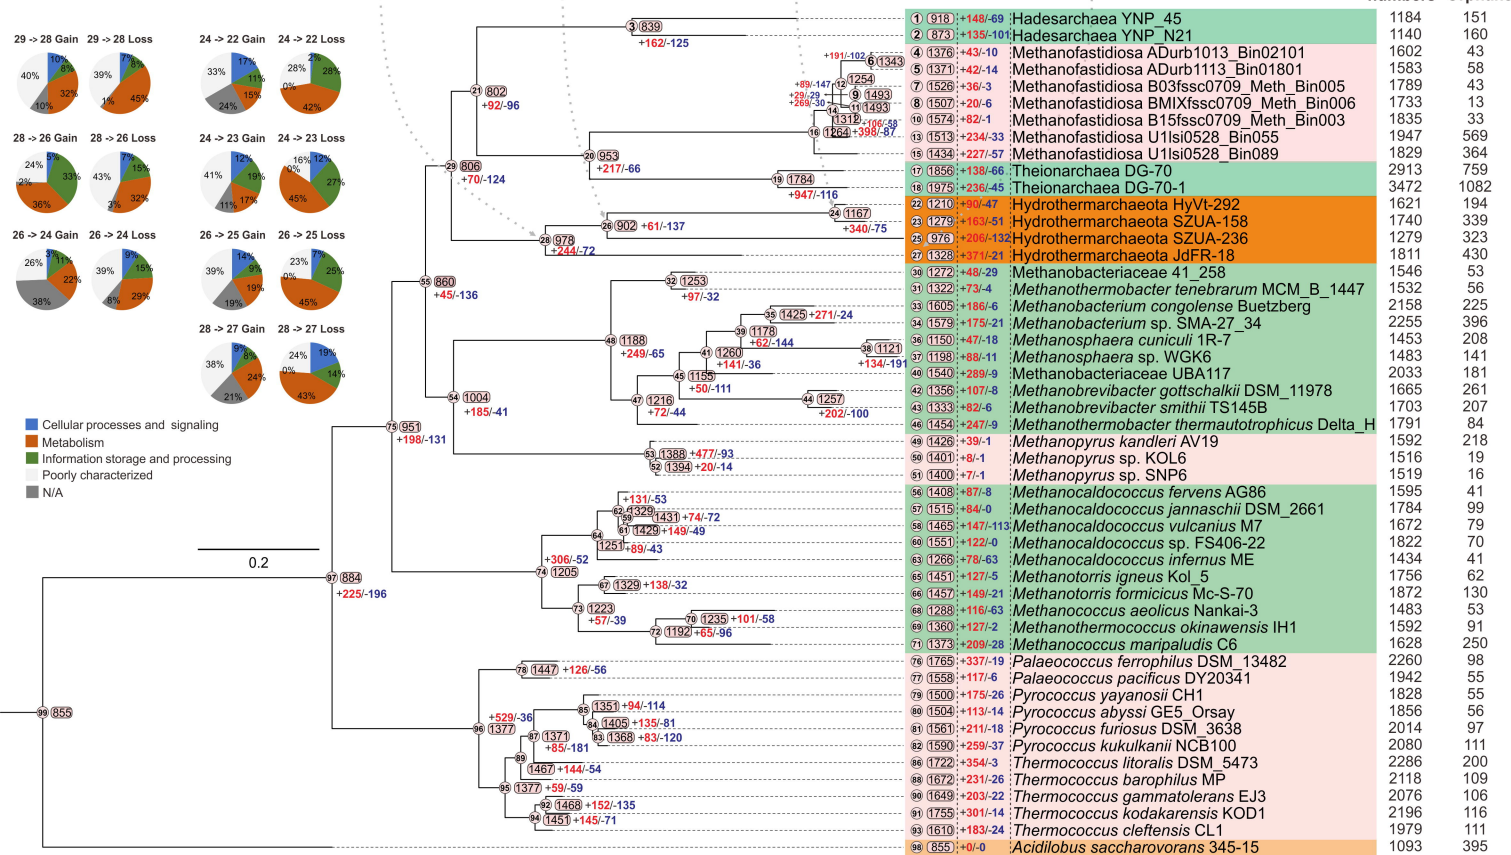

Source: https://www.biorxiv.org/content/10.1101/768564v1.full.pdf
